---

# Are Self-Thinning Constraints Needed in a Tree-Specific Mortality Model?

Robert A. Monserud, Thomas Ledermann, and Hubert Sterba

---

**ABSTRACT.** Can a tree-specific mortality model elicit expected forest stand density dynamics without imposing stand-level constraints such as Reineke's maximum stand density index ( $SDI_{max}$ ) or the  $-3/2$  power law of self-thinning? We examine this emergent properties question using the Austrian stand simulator PROGNAUS. This simulator was chosen specifically because it does not use stand density constraints to determine individual tree mortality rates. In addition, it is based on a probability sample of the population that includes the span of the data being used to test the hypothesis. Initial conditions were obtained from 27 permanent research plots that were established in young pure stands of Norway spruce (*Picea abies* L. Karst.) and Scots pine (*Pinus sylvestris* L.) in Austria. A growth period of 250 years was simulated. We conduct our test in two parts. First, we compare our simulated results to Reineke's theory of maximum density and stand density index by examining the self-thinning relationship between stem number per hectare and quadratic mean diameter (log-log scale). Second, we compare our results to Sterba's full competition density rule, which incorporates dominant height along with stem number and quadratic mean diameter. From the results for Norway spruce, we conclude that stand-level density constraints are not necessary to obtain Reineke's maximum size-density relations. Norway spruce results confirm that the maximum size-density relationship reflects reasonable and stable stand dynamics and conforms to that expected by Reineke's theory. Results from simulation of Scots pine also display reasonable and stable stand dynamics, except that they greatly exceed Reineke's maximum stand density index determined empirically from the literature. This Scots pine result argues for stand-level constraints (such as specifying  $SDI_{max}$ ) to ensure that the appropriate intercept for the maximum density line is used. Our second test revealed that the estimated maximum stand density index according to Sterba's theory was too high for both species, but that the relative rankings across plots were correct. Thus, we are left with ambiguous results. First, that a density-dependent individual-tree mortality model, developed on an adequate data set, is sufficient for the desired stand-level behavior of Reineke to emerge. Second, that stand-level constraints on  $SDI_{max}$  need to be imposed if the underlying mortality modeling database is not adequate. FOR. SCI. 50(6):848–858.

**Key Words:** Self-thinning, maximum size-density relationship, mortality model, stand simulation, PROGNAUS, Reineke.

---

Robert A. Monserud, Pacific Northwest Research Station, USDA Forest Service, 620 SW Main Street, Suite 400, Portland, OR 97205— Fax: (503) 808-2020; rmonserud@fs.fed.us; Bundesamt und Forschungszentrum für Wald (BFW), Seckendorff-Gudent-Weg 8, A-1131 Vienna, Austria—Fax: 43-1-87838-1250; thomas.ledermann@bfw.gv.at. Hubert Sterba, Department of Forest and Soil Sciences, Institute of Forest Growth and Yield Research, University of Natural Resources and Applied Life Sciences, Vienna (BOKU), Peter Jordan Strasse 82, A-1190 Vienna, Austria—Fax: 43-1-47654-4242; hubert.sterba@boku.ac.at.

**Acknowledgments:** We are grateful to Markus Neumann and Günter Rössler from the Austrian Federal Research and Training Centre for Forests (BFW) in Vienna for making the Rauchwart and Hauersteig data available. Andrew P. Robinson, Albert R. Stage, William R. Wykoff, and the Guest Editor provided helpful review comments. The senior author thanks Hubert Hasenauer for his generous hospitality in Vienna, which allowed for completion of this paper.

---

Manuscript received July 24, 2003, accepted September 14, 2004

Copyright © 0 by the Society of American Foresters

**D**OES SELF-THINNING at a higher level (forest stand) emerge from the behavior of lower-level tree models? Specifically, is a tree-level mortality model sufficient to elicit stand self-thinning dynamics without resorting to a density constraint at the stand level? This can be viewed as a question of emergent properties: will the desired property (self-thinning) simply emerge from the lower-order interaction of the individual units (trees), or does it need to be explicitly mandated with constraints at the next higher level (stand)? We begin by examining two concepts (the self-thinning law and mortality modeling in stand simulators) that will allow us to examine this question.

### Self-Thinning

The mortality caused by competition among trees within a stand is called self-thinning (Yoda et al. 1963, Hynynen 1993). Foresters and plant ecologists have long known the strong negative relationship between the number and average size of trees in a given area. Trees at a competitive disadvantage die from crowding and suppression as crowns expand and tree size increases (Johnson et al. 2002). Thus, self-thinning refers to the reduction in tree numbers over time due to density-dependent mortality as the plants increase in size (Yoda et al. 1963). One result is an upper limit to the average size of a given number of trees or plants that occupy an area.

Reineke (1933) observed a linear relationship (on the log-log scale) between number of trees  $N$  and quadratic mean diameter  $dg$  in even-aged stands of full density:

$$\ln(N) = k + q \cdot \ln(dg). \quad (1)$$

Reineke (1933) then found that the slope  $q$  behaved as a constant ( $-1.605$ ) over a range of species. He further noticed that the intercept  $k$  varied across species, but not within species, regardless of site quality and stand age (Hynynen 1993). Thus, maximum stem number at a given  $dg$  is

$$N = C \cdot dg^{-1.605}, \quad (2)$$

where  $C = e^k$ . For convenience, Reineke referred to this maximum number of trees at a  $dg$  of 10 in. (25 cm) as stand density index (SDI). This was the first stand density index that quantified self-thinning. The SDI of an observed stand at a given  $dg_{\text{obs}}$  relates the stand density  $N_{\text{obs}}$  to the maximum possible stand density, and expresses this relative density as the stem number that could have been observed if the stand's  $dg$  value were 25 cm (Sterba 1981):

$$\text{SDI} = N_{\text{obs}} (25/dg_{\text{obs}})^{-1.605}. \quad (3)$$

Working with a variety of agricultural crops and weed species, Yoda et al. (1963) examined mean plant mass across a range of densities and thereby uncovered what they referred to as the  $-3/2$  power law of self-thinning. This principle describes a maximum plant size/density relationship that dictates competition-related self-thinning within a stand of relatively uniform plants (Farnden 1996). Yoda et al. (1963) plotted mean plant mass versus density (number/area) on the log-log scale, and repeatedly observed

a constant slope close to  $-1.5$ . The relation held across all species examined. They observed that in pure even-aged stands there is a maximum population density that is dependent on the plants' stage of development; as time increases, these upper limits tend to converge on a fixed density level (Drew and Flewelling 1977).

These parallel and seminal ideas, Reineke's (1933) stand density index and the  $-3/2$  power law formalized by Yoda et al. (1963), have received both great praise (White and Harper 1970, Hutchings and Budd 1981, Westoby 1984) and enormous scrutiny (Weller 1987, Zeide 1987). Robinson (1998) considers the  $-3/2$  power law to be "a rigid manifestation" of the self-thinning property. Biologists have difficulty accepting theories that some call "laws," as the comprehensive review articles by Weller (1987) and Zeide (1987) make clear. The  $-3/2$  exponent of the relationship between mean plant mass and plant density in overcrowded monocultures was once considered a universal constant (Hutchings 1983), but recent analyses examine deviations (Osawa 1995). Sources of variation include species differences, shade tolerance, and site quality (Weller 1987, Zeide 1987). Examining the effects of stand conditions on the thinning exponent, Zeide (1987) suggested that steeper slopes of the self-thinning line are associated with stands of optimal conditions, while flatter slopes are related to those of suboptimal conditions. Therefore, variation in the thinning exponent is not necessarily species-specific, but it may be site-specific (Osawa 1995). Sterba and Monserud (1993) generalized the concept to uneven-aged mixed-species stands, and tied their results to Assmann's (1970) idea of potential density (the variation in potential density across stands with the same site index, due to different carrying capacities). They then found that the slope of the maximum density line became flatter as stand structure (the diameter distribution) became more skewed and uneven-aged.

Although the self-thinning law was meant to describe unmanaged conditions, foresters have used the maximum size-density relationship inherent in self-thinning to good advantage, in the form of stand management diagrams (Farnden 1996). These are graphical representations of stand development which, in various formats, illustrate the interactions between density or some other measure of stocking, and various stand parameters such as mean diameter, top height, and volume (Farnden 1996). Often, the plant mass variable of Yoda et al. (1963) is replaced by mean volume (Drew and Flewelling 1979) or even mean diameter (Long 1985). Note that the  $-3/2$  power law exponent relating volume to stem number is equivalent to Reineke's  $-1.6$  exponent relating quadratic mean diameter  $dg$  to stem number only when volume is proportional to  $dg^{2.4}$ .

### Sterba's Maximum Stand Density Index

Based on the Japanese ideas of Kira et al. (1953), Yoda et al. (1963), Ando (1968), and Ando et al. (1968), and an earlier development by Reineke (1933), Sterba (1987) derived a competition-density rule for even-aged stands. Considering a number of stands on the same site at the same age

(and thus the same dominant height), but different in density, Sterba (1987) described the relationship between stem number  $N$  and the quadratic mean diameter  $dg$  as a hyperbola when dominant height is constant,

$$dg = 1/(A \cdot N + B), \quad (4)$$

with parameters  $A$  and  $B$ . These parameters are not used to make projections of quadratic mean diameter over time, but only to define maximum density at a given dominant height (Sterba and Monserud 1993). This approach is similar to a hyperbolic function used by Kira et al. (1953). The corresponding stand basal area  $G$  is

$$G = N \cdot dg^2 \cdot \frac{\pi}{4} = \frac{N\pi}{4(A \cdot N + B)^2}. \quad (5)$$

The stem number producing maximum basal area ( $N_{G_{\max}}$ ) is obtained by setting the derivative with respect to  $N$  equal to zero:

$$\frac{dG}{dN} = \frac{\pi(B - A \cdot N)}{4(A \cdot N + B)^3} = 0. \quad (6)$$

Solving Equation 6 for  $N$  gives the maximum density line,

$$N_{G_{\max}} = B/A. \quad (7)$$

The corresponding quadratic mean diameter is

$$dg_{G_{\max}} = 1/(2B). \quad (8)$$

At a constant dominant height, these values describe the asymptotic density of Yoda et al. (1963) (Sterba 1987).

Ando (1968) and Ando et al. (1968) pointed out that the parameters  $A$  and  $B$  are power functions of dominant height  $h$ . Thus, the full Competition Density Rule then describes quadratic mean diameter as a function of dominant height  $h$  and stem number  $N$ ,

$$dg = \frac{1}{a_0 h^{a_1} \cdot N + b_0 h^{b_1}}, \quad (9)$$

with parameters  $a_0$ ,  $a_1$ ,  $b_0$ ,  $b_1$ . This derivation allows for estimating the points of maximum density from a number of plots that need not be fully stocked, but rather vary in density and dominant height (Sterba and Monserud 1993). The corresponding maximum density and quadratic mean diameter are then

$$N_{G_{\max}} = \frac{b_0}{a_0} h^{b_1 - a_1}, \quad (10)$$

and

$$dg_{G_{\max}} = \frac{1}{2b_0} h^{-b_1}. \quad (11)$$

Expressing height as a function of mean diameter at this maximum density yields

$$h = (2b_0 dg_{G_{\max}})^{-1/b_1}. \quad (12)$$

Substituting  $h$  in Equation 10 for this expression gives

$$N_{G_{\max}} = \frac{b_0}{a_0} (2b_0 dg_{G_{\max}})^{a_1/b_1 - 1}. \quad (13)$$

This is of the form of Reineke's SDI. Thus, Reineke's slope  $q$  and intercept  $C$  of the maximum density line are

$$q = \frac{a_1}{b_1} - 1 \quad (14)$$

and

$$C = \frac{b_0}{a_0} (2b_0)^q. \quad (15)$$

Therefore, SDI and  $N_{G_{\max}}$  at an index diameter of 25 cm are

$$\text{SDI} = C \cdot 25^q = N_{G_{\max}} = \frac{b_0}{a_0} (2b_0 25)^{a_1/b_1 - 1} = \text{SDI}_{\max}. \quad (16)$$

Thus, by estimating the coefficients  $a_0$ ,  $a_1$ ,  $b_0$ ,  $b_1$  from Equation 9 for different site classes and referring to an index diameter of 25 cm, Sterba (1987) characterized the potential densities of these site classes in terms of  $\text{SDI}_{\max}$ .

### Mortality Models in Stand Simulation Models

Individual-tree stand simulation models have served as both research tools and forest management aides for nearly 40 years (Dudek and Ek 1980, Ek et al. 1988, Vanclay and Skovsgaard 1997). Both the  $-3/2$  power law of self-thinning (Yoda et al. 1963) and Reineke's (1933) SDI have been used in several forest stand growth models as density-dependent stand level constraints (e.g., FVS—Wyckoff et al. 1982, Wyckoff 1986, Hamilton 1986, Hamilton 1990; STAND—Pukkala and Miina 1997; BWIN—Nagel 1999; MELA—Hynynen et al. 2002).

Usually, the main motivations for imposing stand-level constraints in individual-tree stand simulation models are (1) to ensure proper stand density dynamics sensu Reineke's (1933) rule or the  $-3/2$  power law (Yoda et al. 1963); and (2) to set the intercept of the self-thinning line, which is a measure for site productivity in terms of Assmann's (1970) potential density. Wyckoff et al. (1982), for example, used maximum basal area to set this intercept, as Assmann (1970) recommended. In addition, Hamilton (1990) uses stand-level constraints to extend the area of applicability of the mortality model.

We now focus on how tree mortality is modeled in two of these individual-tree stand simulators. The first (FVS) uses stand-level mortality constraints, and the second (PROGNAUS) does not.

The forest vegetation simulator (FVS) is an individual-tree nonspatial forest growth model built around a set of empirically derived equations of diameter growth, height growth, crown ratio, regeneration, and mortality (Teck et al. 1997, Crookston and Havis 2002). The core model of the western variants of FVS was originally known as Prognosis (Stage 1973), and covers northern Idaho and western Montana (Wyckoff et al. 1982). Typical stands in the northern Rockies are mixed-species and uneven-aged, often with

diverse stand structures. Because such irregular stands do not satisfy the pure monoculture assumption underpinning the  $-3/2$  power law of self-thinning of Yoda et al. (1963), a rather complex series of stand-density constraints is used to model mortality. To begin, an individual-tree mortality rate is predicted as a function of diameter. Three stand-density adjustments are then made to this rate (Wykoff et al. 1982). The first is an approach to normality (full stocking) adjustment, which depends on quadratic mean diameter  $dg$ , density (trees/area), and predicted change in  $dg$ . The second density-dependent mortality rate adjustment is based on the assumption that there is a maximum basal area that a site can sustain and that this maximum varies by site quality. The third adjustment is intended to reflect the increased probability of mortality that is associated with advanced age in overmature trees; diameter (size) is used as a surrogate for age. Thus, the probability of mortality is increased for large-diameter trees in stands with a large mean diameter. Finally, all three stand-level adjustments are combined in a composite estimate of individual-tree mortality rate. There are currently 20 different geographic variants of FVS (Teck et al. 1997, Crookston and Havis 2002), each with their own parameterization. Most of them use this same three-step formulation to impose stand-density constraints on predicted tree mortality.

Hamilton (1990) carefully examined the structure of the mortality model in FVS. He began with the mortality model developed by Hamilton (1986) for Version 5.1 of the Stand Prognosis Model (Wykoff 1986). This initial model (termed “the new model”) was a typical individual-tree mortality model without stand-level constraints. Hamilton (1990) then systematically introduced six assumptions intended to increase the applicability of the mortality model when it is used outside the range of conditions represented in the original development data set. These six mortality assumptions amount to the three-step procedure used by Wykoff et al. (1982) to introduce stand-level constraints (outlined above). Hamilton (1990) concluded that incorporating these assumptions (stand-level constraints) increased model performance and extended its range of applicability.

PROGNAUS (PROGNosis for AUStria, Monserud et al. 1997) is a forest stand growth model designed to simulate the growth and development of both pure even-aged and mixed-species uneven-aged stands in Austria using a non-spatial individual-tree methodology (Monserud et al. 1997). The current version of the forest stand growth model PROGNAUS comprises the following basic submodels: a basal area increment model (Monserud and Sterba 1996, for coefficients cf. Hasenauer 2000), a height increment model (Gschwantner 2004), a crown ratio model (Hasenauer and Monserud 1996), an ingrowth model (Lederemann 2002), and a mortality model (Monserud and Sterba 1999, for coefficients cf. Hasenauer 2000). All submodels were developed from remeasured permanent plot data from Austrian National Forest Inventory data (the first inventory cycle, 1981–1990), and supplemented by permanent research plots. The basal area increment model (Monserud

and Sterba 1996) does not use site index or age to determine productivity.

In contrast to the stand-level mortality constraints in FVS, PROGNAUS uses only an individual-tree mortality model (Monserud and Sterba 1999). This mortality model is a logistic function with the same general form for all species, which were modeled independently:

$$P = \left( 1 + \exp \left[ b_0 + \frac{b_1}{D} + b_2 CR + b_3 BAL + b_4 D + b_5 D^2 \right] \right)^{-1}, \quad (17)$$

where  $P$  is the probability of mortality (5 year),  $D$  is diameter (cm) at breast height (1.3 m), CR is crown ratio (live crown length to total tree height), BAL is basal area in larger trees ( $m^2 ha^{-1}$ ), and  $b_0$ – $b_5$  are maximum likelihood estimates of the parameters. Note that BAL contains both tree-specific and stand-specific information.

All parameter estimates conform to biological expectations (Monserud and Sterba 1999). The intercept is positive and the coefficient of  $D^{-1}$  is negative in all cases, resulting in decreasing mortality rates with increasing diameter. The coefficients of  $D$  and  $D^2$  were significant only for Norway spruce (*Picea abies* L. Karst.), indicating that for this tree species a senescence effect could be detected. Furthermore, the coefficient of CR is positive in all cases, resulting in increasing mortality rates as crown ratio decreases; and the coefficient of BAL is negative in all cases, indicating that mortality rate will be higher as basal area in larger trees increases and a tree’s competitive status is less favorable. In general, the species-specific mortality models are all well-behaved and match the observed mortality rates quite well (Monserud and Sterba 1999).

### Objective

In this analysis we seek to test whether stand-level constraints such as Reineke’s maximum density line and Sterba’s full competition density rule are necessary components of an individual-tree model of mortality. Thus, we are using two complementary theories (Reineke’s and Sterba’s) to test the behavior of the simulation model. If the theory emerges without being explicitly programmed, then it does not need to be forced as a constraint in the mortality model.

## Methods

### Data and Analysis

We rely on data from permanent research plots that were established in young pure stands of Norway spruce (*Picea abies* L. Karst.) and Scots pine (*Pinus sylvestris* L.) for thinning and fertilizing experiments. These data represent the northern, eastern, and southern part of Austria and are the two most important tree species (Fig. 1) in these areas.

Although repeated measurements were available from all research plots, we only used data from the very first measurement before any treatment (thinning or fertilizing) had been conducted. In the selection of the research plots, we looked primarily for even-aged, single-species structures. This

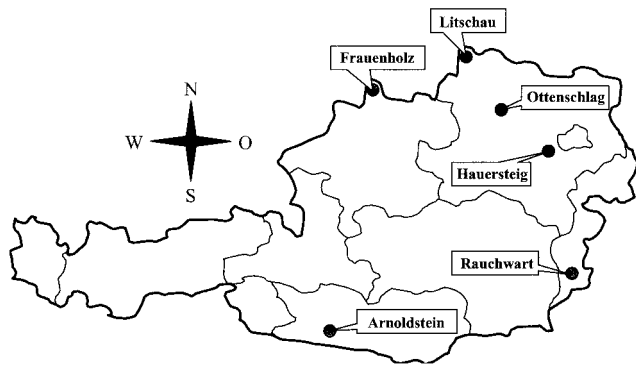

**Figure 1.** Locations of the research plots in northern, eastern, and southern Austria.

resulted in 27 plots, each showing full crown closure and an SDI value greater than 700 (Table 1). We lack even-aged permanent plots of lower density that are needed to examine low-density stand behavior, and for testing Sterba's (1987) full competition density rule. Thus, we created two additional replicates of these stands and then simulated moderate and heavy thinning in the first period by randomly removing 30% and 85% of the stems in each plot, respectively.

For carrying out the simulation runs, the forest stand growth model PROGNAUS was initialized for each individual plot. The ingrowth model of the simulator was deactivated for all simulation runs to ensure pure species and even-aged stand development. A growth period of 250 years for Norway spruce and Scots pine was simulated. To obtain estimates of Reineke's (1933) slope coefficient  $q$  and the maximum stand density index ( $SDI_{max}$ ), we conducted our test in two parts following different approaches.

First, we compared our simulated results to Reineke's (1933) theory of maximum density and stand density index. Thus, from the growth simulations of the unthinned plots we recorded pairs of the quadratic mean diameter  $dg$  and the stem number  $N$  at each time period. We then determined the time period when the quadratic mean diameter exceeded 25 cm, and calculated the slope  $q_{25}$  using  $dg$  and  $N$  from the beginning and the end of this growth period. This can be considered as a close approximation of the tangent to the plot-specific  $\ln(N)$  versus  $\ln(dg)$  curve at a  $dg$  value of 25 cm. The reference value was based on our assumption that we expected the unthinned plots to reach full site occupancy latest when they reach a  $dg$  value of 25 cm. Due to full crown closure and relatively high stand density at the beginning of the simulation runs, this assumption was certainly justified for all our research plots. The estimates of  $q_{25}$  were then compared to values from the literature. Proceeding in the analysis we replaced Reineke's slope of  $-1.605$  by  $q_{25}$  in Equation 3, and calculated the SDI value at each time period from

$$SDI = N_{sim} (25/dg_{sim})^{q_{25}}, \quad (18)$$

where  $N_{sim}$  and  $dg_{sim}$  are the simulated stem number and the simulated quadratic mean diameter, respectively. The maximum stand density index of a plot was then determined by

inspection for each stand simulation, and referred to as  $SDI_{maxR}$ . Usually, this  $SDI_{maxR}$  value was found close to  $dg = 25$  cm.

Second, we were also interested in estimating Sterba's (1987) full competition density rule from the behavior of the simulation model. Thus, for all plots (i.e., the unthinned, the moderately thinned, and the heavily thinned plots), we recorded triplets of the simulated quadratic mean diameter  $dg$ , stem number  $N$ , and dominant height  $h$ . From Equation 14 we can express parameter  $a_1$  as

$$a_1 = (q + 1)b_1. \quad (19)$$

By reformulating Equation 16, we obtain parameter  $a_0$  as

$$a_0 = (b_0/SDI_{max})(2b_025)^q. \quad (20)$$

Substituting both parameters in the full competition density rule (Equation 9), we can write

$$dg = \frac{1}{\frac{b_0}{SDI_{max}} (50b_0)^q h^{(q+1)b_1} N + b_0 h^{b_1}}. \quad (21)$$

Hence, using Equation 21 as the objective function and nonlinear regression (PROC NLIN, Gauss-Newton iterative method, SAS Institute 1989), we estimated both  $q$  and  $SDI_{max}$  along with parameters  $b_0$ ,  $b_1$  based on all three thinning trials of the respective plot. These estimates of  $q$  and  $SDI_{max}$  we referred to as  $q_{ST}$  and  $SDI_{maxST}$ , respectively. Both the calculation of  $SDI_{maxR}$  along with  $q_{25}$  and the estimation of  $SDI_{maxST}$  along with  $q_{ST}$  were done separately for each stand (plot), because the stand density index can vary with site productivity.

### Test Criteria

We are primarily interested in determining whether stand dynamics over time is stable and reasonable. Specifically, this includes the following criteria:

1. Reineke's slope of the maximum density line ( $-1.605$ ) should be approximated when the unthinned stands reach full site occupancy, which we expect to occur at a  $dg$  value close to 25 cm.
2. The maximum density should not be exceeded.
3. Differences in the intercept or  $SDI_{max}$  due to different potential densities (site productivity) at a given dominant height are expected and should conform to ecological expectations.
4. If stand density is low, mortality rates will be low and stand development will be below the maximum density line until full occupancy is reached (Zeide's (1987) young stage of development).
5. If the stand is old (and not regenerating), stand development will drop below the maximum density line (Zeide's (1995) "gappiness" as large trees die).

The individual-tree diameter growth model and the individual-tree mortality model are the key functions for the first test, Reineke's theory of maximum density. The second test,

**Table 1. Stand characteristics of the research plots at the beginning of the simulation runs.**

| Species and Location | Plot no. | Plot size (ha) | $dg^a$ (cm) | $h_{dom}^b$ (m) | $N^c$ ( $ha^{-1}$ ) | $BA^d$ ( $m^2 ha^{-1}$ ) | $SDI^e$ |
|----------------------|----------|----------------|-------------|-----------------|---------------------|--------------------------|---------|
| Norway spruce        |          |                |             |                 |                     |                          |         |
| Litschau             | 019      | 0.0400         | 10.8        | 15.1            | 3125                | 28.6                     | 812     |
|                      | 021      | 0.0400         | 8.9         | 12.5            | 5575                | 34.7                     | 1062    |
| Frauenholz           | 111      | 0.1207         | 18.3        | 20.4            | 1939                | 51.0                     | 1175    |
|                      | 112      | 0.1040         | 18.5        | 20.5            | 1923                | 51.7                     | 1186    |
|                      | 213      | 0.0968         | 18.3        | 20.2            | 2097                | 55.2                     | 1271    |
|                      | 214      | 0.1331         | 17.7        | 18.8            | 2119                | 52.1                     | 1217    |
| Ottenschlag          | 121      | 0.0890         | 17.5        | 22.0            | 2135                | 51.4                     | 1204    |
|                      | 222      | 0.0886         | 17.1        | 22.3            | 2167                | 49.8                     | 1178    |
|                      | 123      | 0.0893         | 17.1        | 22.6            | 2172                | 49.9                     | 1181    |
|                      | 224      | 0.0918         | 17.1        | 21.8            | 2004                | 46.0                     | 1089    |
| Hauersteig           | 001      | 0.2500         | 8.3         | 11.6            | 5124                | 27.7                     | 873     |
|                      | 002      | 0.2500         | 10.1        | 11.9            | 3236                | 25.9                     | 756     |
| Arnoldstein          | 005      | 0.0225         | 12.7        | 13.3            | 2578                | 32.7                     | 869     |
|                      | 006      | 0.0225         | 12.6        | 13.0            | 2400                | 29.9                     | 799     |
|                      | 012      | 0.0227         | 10.8        | 14.9            | 2819                | 25.8                     | 733     |
|                      | 015      | 0.0225         | 9.3         | 12.9            | 3467                | 23.6                     | 709     |
|                      | 016      | 0.0100         | 9.0         | 12.1            | 3700                | 23.5                     | 718     |
| Scots pine           |          |                |             |                 |                     |                          |         |
| Arnoldstein          | 001      | 0.0222         | 13.1        | 13.7            | 3649                | 49.2                     | 1293    |
|                      | 002      | 0.0230         | 15.9        | 15.4            | 2348                | 46.6                     | 1136    |
| Rauchwart            | 305010   | 0.1000         | 8.7         | 8.4             | 4380                | 26.0                     | 805     |
|                      | 305020   | 0.1000         | 8.9         | 8.0             | 5170                | 32.2                     | 985     |
|                      | 305030   | 0.1000         | 8.5         | 8.1             | 5030                | 28.5                     | 890     |
|                      | 306010   | 0.1000         | 8.7         | 8.7             | 5430                | 32.3                     | 998     |
|                      | 306020   | 0.1000         | 8.8         | 8.8             | 5710                | 34.7                     | 1069    |
|                      | 307030   | 0.1000         | 9.0         | 9.0             | 5720                | 36.4                     | 1110    |
|                      | 308040   | 0.1000         | 9.5         | 9.4             | 5520                | 39.1                     | 1168    |
|                      | 308050   | 0.1000         | 9.4         | 10.0            | 5310                | 36.9                     | 1105    |

<sup>a</sup>  $dg$  is the quadratic mean diameter.

<sup>b</sup>  $h_{dom}$  is the dominant height.

<sup>c</sup>  $N$  is the stem number.

<sup>d</sup>  $BA$  is the basal area.

<sup>e</sup>  $SDI = N(25/dg)^{-1.605}$ , Stand Density Index (Reineke 1933).

Sterba's full competition density rule, is stronger and requires proper interaction of all tree-specific models (viz., diameter growth, height growth, mortality, and crown ratio) for simulating full dynamics. PROGNAUS is well suited for this test because (1) these maximum density relations were not used to model mortality, and (2) it is based on a probability sample of the population that includes the span of the data being used to test the hypothesis in question.

## Results

Based on the simulations of the unthinned plots, we found for both species that the relationship between maximum stem number per hectare  $N$  and quadratic mean diameter  $dg$  of a simulated stand development generally follows the Reineke rule (Fig. 2). Stand dynamics over the 250-year simulations are stable and reasonable. Basically, the trajectories proceed from left to right (Fig. 2). None of the displayed lines strictly follows a straight line; Norway spruce shows definite curvature, while Scots pine shows minor curvature (Fig. 2).

The heavy 85% thinning simulations resulted in a prolonged period of low mortality rates as stand density increased. Eventually, the thinned and unthinned simulations became coincident for large quadratic mean diameters. The

30% thinning (not displayed) is intermediate between the unthinned simulations and 85% thinnings in Figure 2.

In Table 2 we display the slope  $q_{25}$  determined from the unthinned plots when a  $dg$  value of 25 cm was reached. Note that Sterba's theory was not yet used in these determinations. Estimates of  $q_{25}$  range from  $-1.3$  to  $-1.9$  for Norway spruce, with a mean of  $-1.56$ . Estimates of the slope range from  $-1.5$  to  $-2.0$  for Scots pine, with a mean of  $-1.82$ . This range of slopes coincides closely with those listed by Sterba (1981, 1987) for the same regions in Austria.

Next, we examine our results of  $SDI_{maxR}$ , the overall maximum SDI found by inspection of the unthinned plots using  $q_{25}$  as the exponent. Estimates of  $SDI_{maxR}$  range from 1,057 to 1,571 for Norway spruce, with a mean of 1,366 (Table 2). Estimates of  $SDI_{maxR}$  range from 1,397 to 1,582 for Scots pine, with a mean of 1,459.

From the studies of Sterba (1981, 1987, 2003), we have estimates of potential density in terms of  $SDI_{max}$  for several collections of research thinning plots that either are the same plots that we used for simulation (Hauersteig and Rauchwart) or are from the same locality and vegetation type (Frauenholz and Ottenschlag) (see Table 1). We begin with Norway spruce. The Litschau plots are located in a

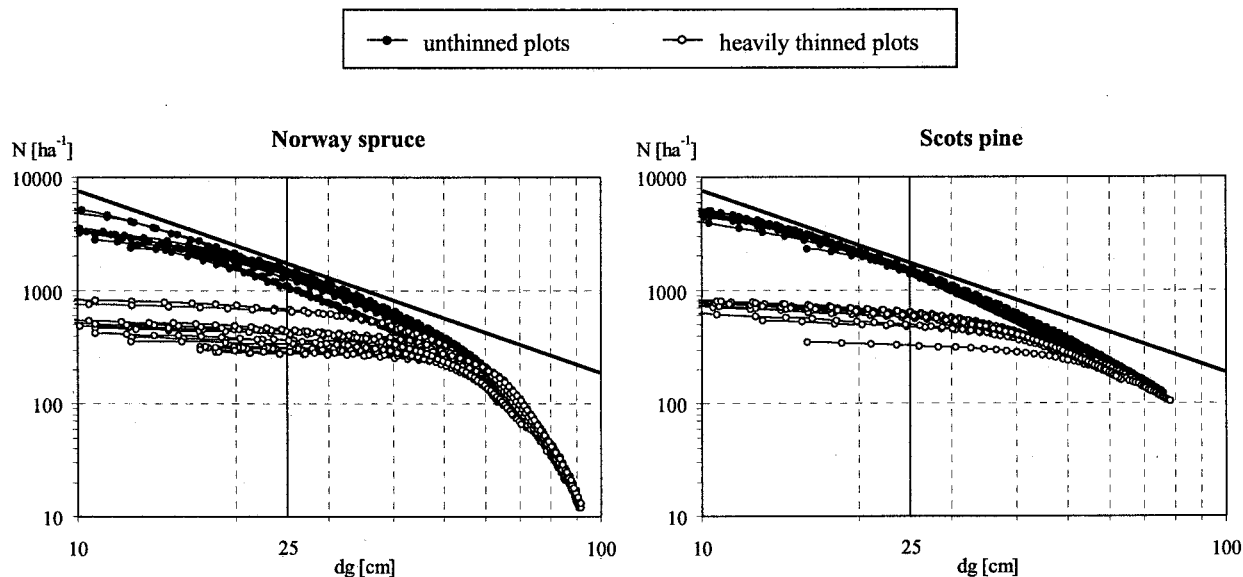

Figure 2. Relationship between stem number per hectare ( $N$ ) and quadratic mean diameter ( $d_g$ ) on the log-log scale for stands of Norway spruce (*Picea abies* L. Karst.) and Scots pine (*Pinus sylvestris* L.). Stand development has been simulated for 250 years using the forest stand growth model PROGNAUS. The bold lines follow the slope of  $-1.605$  postulated by Reineke (1933). On heavily thinned plots 85% of the trees were removed randomly before the simulation runs had been started. Plots with moderate thinning are not displayed in this graph.

region where usually the yield table “Weitra” is used. For this region Sterba (1981) found an  $SDI_{max}$  value of 1,310 on medium sites. This compares closely to our average estimate of 1,320 (Table 2). The plots in Arnoldstein are situated in a region for which the yield table “Bayern” is recommended. Sterba (1981) found a mean of 1,280 for this region. Our estimates for Arnoldstein averaged 1,272. Plots in Frauenholz and Ottenschlag are in the *Oxalis acetosella* vegetation type, and the Wald- and Mühlviertel region. They correspond to good sites in the “Weitra” yield table. Sterba (1981) lists the  $SDI_{max}$  as 1,410. Our eight plots average 1,430. For Hauersteig, Sterba (2003) lists the  $SDI_{max}$  as 1,028; our estimates are much higher at 1,442. For Scots pine in Rauchwart, Sterba (2003) lists  $SDI_{max}$  as 893; our estimates average 1,440, considerably higher. For Scots pine in Arnoldstein, our estimates average 1,539, again considerably higher than Sterba’s (2003) overall average of 921. Schnedl (2003) found that  $SDI_{max}$  averaged 1,152 for Scots pine across all of Austria and 1,124 in eastern Austria. In summary,  $SDI_{maxR}$  was quite close to published values for Norway spruce, except for Hauersteig. In contrast,  $SDI_{maxR}$  greatly exceeded published values for Scots pine.

We then examined model predictions in relation to Sterba’s theory. For Norway spruce, slope  $q_{ST}$  varied from  $-1.3$  to  $-1.9$ , with a mean of  $-1.59$  (Table 2). With a standard error of 0.10, slope  $q_{ST}$  is not significantly different from Reineke’s  $-1.605$ . For Scots pine, mean slope  $q_{ST}$  varied from  $-1.5$  to  $-1.9$ , with a mean of  $-1.76$  (Table 2). With a standard error of 0.13, mean slope  $q_{ST}$  is also not significantly different from Reineke’s  $-1.605$ .

Stand density index  $SDI_{maxST}$  told a rather different story. Estimates of  $SDI_{maxST}$  range from 1,523 to 2,385 for Norway spruce, with a mean of 1927 (Table 2). Estimates of

$SDI_{maxST}$  range from 1,954 to 3,299 for Scots pine, with a mean of 2,242.  $SDI_{maxST}$  exceeds  $SDI_{max}$  by 561 for Norway spruce, and by 813 for Scots pine (Table 2). Clearly,  $SDI_{maxST}$  estimated from Sterba’s full competition density rule greatly exceeded both published values and estimates of  $SDI_{maxR}$ , although the slope  $q_{ST}$  was close to published values.

## Discussion

Let us begin with our criteria.

**Criterion 1**—Reineke’s slope  $q$  of the maximum density line ( $-1.605$ ) was approximated fairly well by  $q_{25}$  of the unthinned plots once they reached a  $d_g$  value of 25 cm. Estimates for Norway spruce averaged  $-1.56$  and estimates for Scots pine averaged  $-1.82$  (Table 2). The maximum density line served almost as a tangent to the unthinned simulations both for Norway spruce and for Scots pine (Fig. 2). Basically, no evidence appeared to suggest that the slope  $q$  was poorly approximated. We also estimated the slope using Sterba’s full competition density rule. Again results were very close to Reineke’s slope: the average slope  $q_{ST}$  was  $-1.59$  for Norway spruce and  $-1.76$  for Scots pine (Table 2). Mean slope  $q_{ST}$  was not significantly different from Reineke’s  $-1.605$  for either species.

**Criterion 2**—We estimated the level of Reineke’s maximum density line by using stand density index, which is related to the intercept. Our estimates of  $SDI_{maxR}$ , the overall maximum SDI found by inspection of the unthinned plots (Table 2), were very close to estimates found in the literature for Norway spruce, except for one installation (Hauersteig). Estimates of  $SDI_{maxR}$  for Scots pine considerably exceeded estimates found in the literature (by 50%). We also estimated  $SDI_{maxST}$  simultaneously with slope  $q_{ST}$

**Table 2. Estimates of Reineke's (1933) slope coefficient  $q$  and of potential density in terms of  $SDI_{max}$  obtained by two different methods.**

| Species and Location | Plot no. | Inspection |                |            | Sterba (1987) |                 |            |
|----------------------|----------|------------|----------------|------------|---------------|-----------------|------------|
|                      |          | $q_{25}^a$ | $SDI_{maxR}^b$ | $q_{ST}^c$ | Std. error    | $SDI_{maxST}^d$ | Std. Error |
| Norway spruce        |          |            |                |            |               |                 |            |
| Litschau             | 019      | -1.525     | 1289           | -1.507     | 0.100         | 1761            | 69         |
|                      | 021      | -1.780     | 1351           | -1.646     | 0.099         | 1745            | 84         |
| Frauenholz           | 111      | -1.424     | 1418           | -1.681     | 0.109         | 2176            | 73         |
|                      | 112      | -1.323     | 1396           | -1.824     | 0.118         | 2180            | 81         |
|                      | 213      | -1.545     | 1429           | -1.758     | 0.150         | 2385            | 125        |
|                      | 214      | -1.497     | 1463           | -1.780     | 0.116         | 2236            | 82         |
| Ottenschlag          | 121      | -1.472     | 1428           | -1.495     | 0.105         | 2086            | 79         |
|                      | 222      | -1.542     | 1412           | -1.392     | 0.107         | 2076            | 84         |
|                      | 123      | -1.499     | 1419           | -1.460     | 0.096         | 2021            | 71         |
|                      | 224      | -1.281     | 1379           | -1.371     | 0.098         | 1985            | 66         |
| Hauersteig           | 001      | -1.878     | 1454           | -1.773     | 0.043         | 1534            | 20         |
|                      | 002      | -1.624     | 1430           | -1.875     | 0.056         | 1523            | 27         |
| Arnoldstein          | 005      | -1.462     | 1571           | -1.712     | 0.059         | 1917            | 31         |
|                      | 006      | -1.462     | 1515           | -1.636     | 0.064         | 1970            | 36         |
|                      | 012      | -1.683     | 1057           | -1.454     | 0.132         | 1683            | 116        |
|                      | 015      | -1.686     | 1113           | -1.442     | 0.117         | 1589            | 98         |
|                      | 016      | -1.824     | 1104           | -1.292     | 0.135         | 1891            | 156        |
| Mean                 |          | -1.559     | 1366           | -1.594     | 0.100         | 1927            | 76         |
| Scots pine           |          |            |                |            |               |                 |            |
| Arnoldstein          | 001      | -1.704     | 1582           | -1.465     | 0.239         | 3299            | 351        |
|                      | 002      | -1.475     | 1496           | -1.748     | 0.127         | 2392            | 88         |
| Rauchwart            | 305010   | -1.809     | 1397           | -1.715     | 0.105         | 2025            | 93         |
|                      | 305020   | -1.981     | 1455           | -1.797     | 0.111         | 2074            | 107        |
|                      | 305030   | -1.936     | 1443           | -1.803     | 0.100         | 1954            | 86         |
|                      | 306010   | -1.942     | 1430           | -1.817     | 0.109         | 2035            | 108        |
|                      | 306020   | -1.950     | 1446           | -1.896     | 0.100         | 1924            | 91         |
|                      | 307030   | -1.826     | 1454           | -1.845     | 0.129         | 2106            | 136        |
|                      | 308040   | -1.821     | 1450           | -1.778     | 0.144         | 2298            | 178        |
|                      | 308050   | -1.786     | 1441           | -1.745     | 0.141         | 2314            | 175        |
| Mean                 |          | -1.823     | 1459           | -1.761     | 0.130         | 2242            | 141        |

<sup>a</sup> Slope coefficient determined from the  $\ln(N)$  versus  $\ln(dg)$  trajectory when the  $dg$  value exceeded 25 cm.

<sup>b</sup> Overall maximum SDI found by inspection of the unthinned plots;  $SDI = N(25/dg)^{q_{25}}$ .

<sup>c</sup> Slope coefficient determined by Sterba's (1987) full competition density rule.

<sup>d</sup> Potential density in terms of  $SDI_{max}$  obtained by Sterba's (1987) full competition density rule.

and two other parameters of Sterba's full competition density rule.  $SDI_{maxST}$  exceeds  $SDI_{max}$  by more than 500 for Norway spruce and 800 for Scots pine (Table 2). These greatly exceeded values found in the literature. Clearly, the PROGNAUS simulations are not in accordance with Sterba's full competition density rule.

**Criterion 3**—Variation existed from stand to stand, likely a result of differing potential densities (Assmann 1970). This is usually reflected in different values of  $SDI_{max}$  for different regions and vegetation types. For Norway spruce, the relative ranking of both  $SDI_{maxR}$  and  $SDI_{maxST}$  across the different locations met expectations, even though  $SDI_{maxST}$  estimates were 500–600 too large. Arnoldstein illustrates this (Table 2): the first two plots (005, 006) are on rich soils in the floodplain (mean  $SDI_{maxR} = 1,543$ ), and the other three (012, 015, 016) are on poor soils with low water holding capacity (mean  $SDI_{maxR} = 1,091$ ). This means that a constant correction term across all sites seems to be sufficient to adjust the model for region-specific maximum density.

**Criterion 4**—Some stands are stocked with relatively small-diameter trees (e.g.,  $dg < 10$  cm in Table 1) at the

beginning of the simulations. These stands initially are not fully occupying the site, and begin below the maximum density line. This effect is more pronounced for Norway spruce than Scots pine. The thinning simulations showed a low mortality rate as the stands grew and approached the maximum density line (Fig. 2). The thinning simulations clearly show this effect. Mortality rates are very low as the stands grow and begin to approach full occupancy. Once this is reached, the thinned and unthinned simulations are essentially coincident.

**Criterion 5**—As the stands age in the 250-year simulations, stand development drops below the maximum density line (Fig. 2). Old stands do not show asymptotic density because of the increasing proportion of gaps due to two reasons: (1) higher mortality rates for older trees due to senescence effects, and (2) a reduced ability of neighboring trees to close these gaps (Zeide 1995). Regarding the first point, recall that Monserud and Sterba (1999) were able to fit a U-shaped mortality function for Norway spruce, because their sample was large enough to detect the sharp increase in mortality rates for trees larger than 70 cm; no such effect was detected for Scots pine. Regarding the



second point, recall that we intentionally turned off the ingrowth submodel so that the stands would remain pure and even-aged. This precludes the recruitment of trees to fill the gaps. Zeide (1995) assumed that the line would be straight without these gaps. Clearly, the drop-off below the maximum density line as fully stocked stands continue to grow and age is due to senescence mortality and a lack of ingrowth.

In conclusion, criteria 1, 3, 4, and 5 were met for both species. Criterion 2 was met for Norway spruce for the level of Reineke's maximum density line, but was not met for Sterba's full competition density rule. Criterion 2 was not met for Scots pine under either theory.

The results of the simulation runs for both tree species show that the logarithmic relationship between stem number  $N$  and quadratic mean diameter  $dg$  does not follow a straight line, but shows a more or less well-pronounced curvature (Fig. 2). Recall that Reineke's (1933) rule was designed only for "fully stocked" stands. The curvature in our  $\ln(N)$  versus  $\ln(dg)$  relations over time results from young stands that do not exhibit asymptotic density because they have not reached crown closure, and from old stands that do not show asymptotic density because of the increasing mortality rates for older trees due to senescence effects (Norway spruce) and a lack of ingrowth to close these gaps.

As an aside, we did in fact turn on the natural regeneration submodel in PROGNAUS for a third set of simulations, not illustrated here. The result was that the even-aged assumption underpinning the maximum density theory became increasingly violated. Sterba and Monserud (1993) addressed this problem and found that Reineke's maximum density slope became increasingly flatter as stands became more uneven-aged.

This deviation (i.e., curvature) from Reineke's (1933) rule has been repeatedly observed (Zeide 1987). Meyer (1938) had to use a curve concave downward instead of Reineke's (1933) straight line to fit his data on ponderosa pine (*Pinus ponderosa*). Sterba (1981) presented similar results when he calculated  $\ln(N)$  versus  $\ln(dg)$  relationships from Assmann and Franz's (1965) stand model for maximum basal area. Hamilton's (1990) demonstrations do not follow a straight line either.

Hamilton (1990) further proposed additional assumptions (constraints) when the range of applicability of an individual-tree mortality model needs to be extended. He justified these assumptions with the fact that on some habitat types, very small trees and very dense stands were rare in the data set used for parameterization of the mortality model. He also demonstrated the effects when no assumptions were made (see Figure 1 in Hamilton 1990). The result of his demonstration is similar to our results for Scots pine: stands exceed the maximum stand density. Basically, this overestimation of the intercept amounts to a corresponding overestimation of site productivity. Hence, results for Scots pine would favor the arguments to impose density-dependent stand level constraints in an individual-tree growth simulator. However, our results for Norway spruce show

that this is not necessary for obtaining the expected level of Reineke's maximum density line.

What is the cause of the overestimation of  $SDI_{max}$ ? One clue is given by Gschwantner (2004). He analyzed the Austrian National Forest Inventory (ANFI) for the past two decades. Recall that the mortality model (Monserud and Sterba 1999) and key growth components in PROGNAUS were built using only the first inventory cycle, 1981–1990. Gschwantner (2004) found that this first period was characterized by unusually high growth rates and low mortality rates relative to subsequent inventory cycles. He uncovered climatic variation as the cause. It follows that the current parameterization of PROGNAUS could lead to overestimation of the level of the maximum density relationship (e.g.,  $SDI_{max}$ ).

A second reason that the maximum density is exceeded in Scots pine could be due to the relatively small data set used for parameterizing the mortality model (approx. 4,000 for Scots pine versus 26,700 for Norway spruce, see Monserud and Sterba 1999). Recall that Monserud and Sterba (1999) tried and failed to estimate a U-shaped mortality model for Scots pine, due to limited data in advanced ages. The only species that they succeeded in estimating this senescence effect was for Norway spruce, with the largest data set.

Sterba's theory depends heavily on the interrelations among dominant height, mean diameter, and stem number. Particularly, Sterba (1987) used dominant height as a surrogate for age, implicitly assuming that stand treatment has no effect on height growth. However, Gschwantner's (2004) height growth model uses annual diameter growth rate as a predictor variable. Hence, the height growth model may be another culprit for why the PROGNAUS simulations could not fully produce his theory. This situation indicates the difficulty of testing a mortality model in isolation. A model can only be examined fully when it is used as a component of the full stand simulation system.

An often-stressed argument for imposing stand-level constraints in an individual-tree growth simulator is the assumption by many modelers that site productivity (potential density) is not reflected properly without density-based adjustment of the intercept of the maximum density line. However, a proper representation of site productivity is certainly not the sole responsibility of the mortality model. In this context, the basal area (Monserud and Sterba 1996) and the height increment model (Gschwantner 2004) are more important in our study because site factors, which definitely determine site productivity, are only considered in these two models. Thus, we implicitly assumed that there is no site effect on mortality besides that already included in the basal area and the height increment model. In fact, a plausible representation of self-thinning and site productivity is the result of the interactions among all submodels implemented in an individual-tree growth simulator, and again indicates the difficulty of testing a mortality model in isolation.

From the results for Norway spruce (Fig. 2, Table 2), we

conclude that stand-level density constraints are not necessary to obtain Reineke's maximum size-density relations. Norway spruce results confirm that the maximum size-density relationship reflects reasonable and stable stand dynamics and conforms to that expected by Reineke's theory. Results from a simulation of Scots pine also display reasonable and stable stand dynamics, except that they greatly exceed the maximum density line determined empirically from the literature. This argues for stand-level constraints (such as specifying  $SDI_{max}$ ) to ensure that the appropriate intercept for the maximum density line is used. Thus, we are left with ambiguous results: First, that a density-dependent individual-tree mortality model, developed on an adequate data set, is sufficient for the desired stand-level behavior to emerge; and second, that stand-level constraints on  $SDI_{max}$  need to be imposed if the underlying mortality modeling database is not adequate.

## Literature Cited

- ANDO, T. 1968. Ecological studies on the stand density control in even-aged pure stand. Bull. Gov. For. Exp. Station No. 210, Tokyo. 153 p.
- ANDO, T., K. HATIYA, K. DOI, H. KATAOKA, AND Y. KATO. 1968. Studies on the system of density control of sugi (*Cryptomeria japonica*) stand. Bull. Gov. For. Exp. Station No. 209, Tokyo. 76 p.
- ASSMANN, E. 1970. The principles of forest yield studies. Pergamon Press, Oxford. 506 p.
- ASSMANN, E., AND F. FRANZ. 1965. Vorläufige Fichten-Ertragstafel für Bayern. Forstwissenschaftliches Centralblatt. 84:13–43.
- CROOKSTON, N.L., AND R.N. HAVIS. 2002. Second forest vegetation simulator (FVS) conference; February 12–14, Fort Collins, CO. Proceedings RMRS-P-25. Ogden, UT: U.S. Department of Agriculture, Forest Service, Rocky Mountain Research Station. 208 p.
- DREW, T.J., AND J.W. FLEWELLING. 1977. Some recent Japanese theories of yield-density relationships and their application to Monterey pine plantations. For. Sci. 23:517–534.
- DREW, T.J., AND J.W. FLEWELLING. 1979. Stand density management: An alternative approach and its application to Douglas-fir plantations. For. Sci. 25:518–532.
- DUDEK, A., AND A.R. EK. 1980. A bibliography of worldwide literature on individual tree based forest stand growth models. Staff paper series No. 12. Department of Forest Resources, University of Minnesota. St. Paul, MN.
- EK, A.R., S.R. SHIFLEY, AND T.E. BURK. 1988. Forest growth modelling and prediction. USDA For. Serv. Gen. Tech. Rep. NC-120.
- FARNDEN, C. 1996. Stand density management diagrams for lodge-pole pine, white spruce and interior Douglas-fir. Pacific Forestry Centre Information Report BC-X-360. Canadian Forest Service, Victoria, British Columbia. 41 p.
- GSCHWANTNER, T. 2004. Zuwachsänderungen nach den Daten der Österreichischen Waldinventur und ihre klimatischen Ursachen. Ph.D. thesis, Universität für Bodenkultur, Wien, Austria. 123 p.
- HAMILTON JR., D.A. 1986. A logistic model of mortality in thinned and unthinned mixed conifer stands of northern Idaho. For. Sci. 32:989–1000.
- HAMILTON JR., D.A. 1990. Extending the range of applicability of an individual tree mortality model. Can. J. For. Res. 20:1212–1218.
- HASENAUER, H. 2000. Die simultanen Eigenschaften von Waldwachstumsmodellen. Blackwell Wissenschafts-Verlag, Berlin, Wien. 131 p.
- HASENAUER, H., AND R.A. MONSERUD. 1996. A crown ratio model for Austrian forests. For. Ecol. Manage. 84:49–60.
- HUTCHINGS, M. 1983. Ecology's law in search of a theory. New Sci. 98:765–767.
- HUTCHINGS, M.J., AND C.S.J. BUDD. 1981. Plant self-thinning and leaf area dynamics in experimental and natural monocultures. Oikos 36:319–325.
- HYNYNEN, J. 1993. Self-thinning models for even-aged stands of *Pinus sylvestris*, *Picea abies* and *Betula pendula*. Scand. J. For. Res. 8(3):326–336.
- HYNYNEN, J., R. OJANSUU, H. HOKKA, J. SIIPILEHTO, H. SALMINEN, AND P. HAAPALA. 2002. Models for predicting stand development in MELA system. Research Paper 835, Finnish Forest Research Institute, Vantaa, Finland. 116 p.
- JOHNSON, P.S., S.R. SHIFLEY, AND R. ROGERS. 2002. The ecology and silviculture of oaks. CABI Publishing, Wallingford, United Kingdom. 528 p.
- KIRA, T., H. OGAWA, AND N. SAKAZAKI. 1953. Intraspecific competition among higher plants. I. Competition-yield-density interrelationship in regularly dispersed populations. Osaka City Univ., J. Inst. Polytechn. 4(1)D:1–16.
- LEDERMANN, T. 2002. Ein Einwuchsmodell aus den Daten der Österreichischen Waldinventur 1981–1996. Centralblatt für das gesamte Forstwesen. 119:40–77.
- LONG, J.N. 1985. A practical approach to density management. For. Chron. 61:23–27.
- MEYER, W.H. 1938. Yield of even-aged stands of ponderosa pine. USDA Tech. Bull. 630, 59 p.
- MONSERUD, R.A., AND H. STERBA. 1996. A basal area increment model for even- and uneven-aged forest stands in Austria. For. Ecol. Manage. 80:57–80.
- MONSERUD, R.A., AND H. STERBA. 1999. Modeling individual tree mortality for Austrian forest species. For. Ecol. Manage. 113:109–123.
- MONSERUD, R.A., H. STERBA, AND H. HASENAUER. 1997. The single-tree stand growth simulator PROGNAUS. P. 50–56 in Proc. of conf. on forest vegetation simulator, Teck, R., M. Moeur, and J. Adams (eds.). USDA For. Serv. Gen. Tech. Rep. INT-GTR-373.
- NAGEL, J. 1999. Konzeptionelle Überlegungen zum schrittweisen Aufbau eines waldwachstumskundlichen Simulationssystems

- für Nordwestdeutschland. Schriften aus der Forstlichen Fakultät der Universität Göttingen und der Niedersächsischen Forstlichen Versuchsanstalt, Band 128, J.D. Sauerländer's Verlag, Frankfurt am Main. 122 p.
- OSAWA, A. 1995. Inverse relationship of crown fractal dimension to self-thinning exponent of tree populations: A hypothesis. *Can. J. For. Res.* 25:1608–1617.
- PUKKALA, T., AND J. MIINA. 1997. A method for stochastic multi-objective optimization of stand management. *For. Ecol. Manage.* 98:189–203.
- REINEKE, L.H. 1933. Perfecting a stand-density index for even-aged forests. *J. Agric. Res.* 46:627–638.
- ROBINSON, A.P. 1998. Forest ecosystem dynamics: A systematic approach to modelling in a model-rich environment. Ph.D. thesis, University of Minnesota, St. Paul. 235 p.
- SAS INSTITUTE INC. 1989. SAS/STAT® user's guide version 6. 4th ed., vol. 2, SAS Institute Inc., Cary, North Carolina. 846 p.
- SCHNEDL, C. 2003. Zuwachs und potentielle Dichte von Kiefer und Buche in Österreich. Ph.D. thesis, Universität für Bodenkultur, Wien, Austria. 90 p.
- STAGE, A.R. 1973. Prognosis Model for Stand Development. USDA For. Serv. Res. Paper INT-137. 32 p.
- STERBA, H. 1981. Natürlicher Bestockungsgrad und Reinekes SDI. *Centralblatt für das gesamte Forstwesen.* 98:101–116.
- STERBA, H. 1987. Estimating potential density from thinning experiments and inventory data. *For. Sci.* 33:1022–1034.
- STERBA, H. 2003. Zwei Konzepte: Maximale versus asymptotische Bestandesdichte. *in* Deutscher Verband Forstlicher Forschungsanstalten - Sektion Ertragskunde: Beiträge zur Jahrestagung 2003, G. Kenk (ed.). Torgau, p. 233–242.
- STERBA, H., AND R.A. MONSERUD. 1993. The maximum density concept applied to uneven-aged mixed-species stands. *For. Sci.* 39:432–452.
- TECK, R., M. MOEUR, AND J. ADAMS (EDS.). 1997. Proceedings: Forest vegetation simulator conference. USDA For. Serv. Gen. Tech. Rep. INT-GTR-373. 222 p.
- VANCLAY, J.K., AND J.P. SKOVSGAARD. 1997. Evaluating forest growth models. *Ecol. Mod.* 98:1–12.
- WELLER, D.E. 1987. A reevaluation of the  $-3/2$  power rule of self-thinning. *Ecol. Monogr.* 57(1):23–43.
- WESTOBY, M. 1984. The self-thinning rule. *Advan. Ecol. Res.* 14:167–225.
- WHITE, J., AND J.L. HARPER. 1970. Correlated changes in plant size and number in plant populations. *J. Ecol.* 58:467–485.
- WYKOFF, W.R. 1986. Supplement to the user's guide for the stand prognosis model—Version 5.0. USDA For. Serv. Gen. Tech. Rep. INT-208.
- WYKOFF, W.R., N.L. CROOKSTON, AND A.R. STAGE. 1982. User's guide to the stand prognosis model. USDA For. Serv. Gen. Tech. Rep. INT-GTR-133. 112 p.
- YODA, K., T. KIRA, H. OGAWA, AND K. HOZUMI. 1963. Self-thinning in overcrowded pure stands under cultivated and natural conditions. *J. Biol. Osaka City Univ.* 14:107–129.
- ZEIDE, B. 1987. Analysis of the  $3/2$  power law of self-thinning. *For. Sci.* 33:517–537.
- ZEIDE, B. 1995. A relationship between size of trees and their number. *For. Ecol. Manage.* 72:265–272.
